# Supplementary material
Source: PubMed Central journal article supplement (PMC4074214)
Supplement: supp_216.8.1373_JEB079889.pdf [file supp_216.8.1373_JEB079889.pdf]

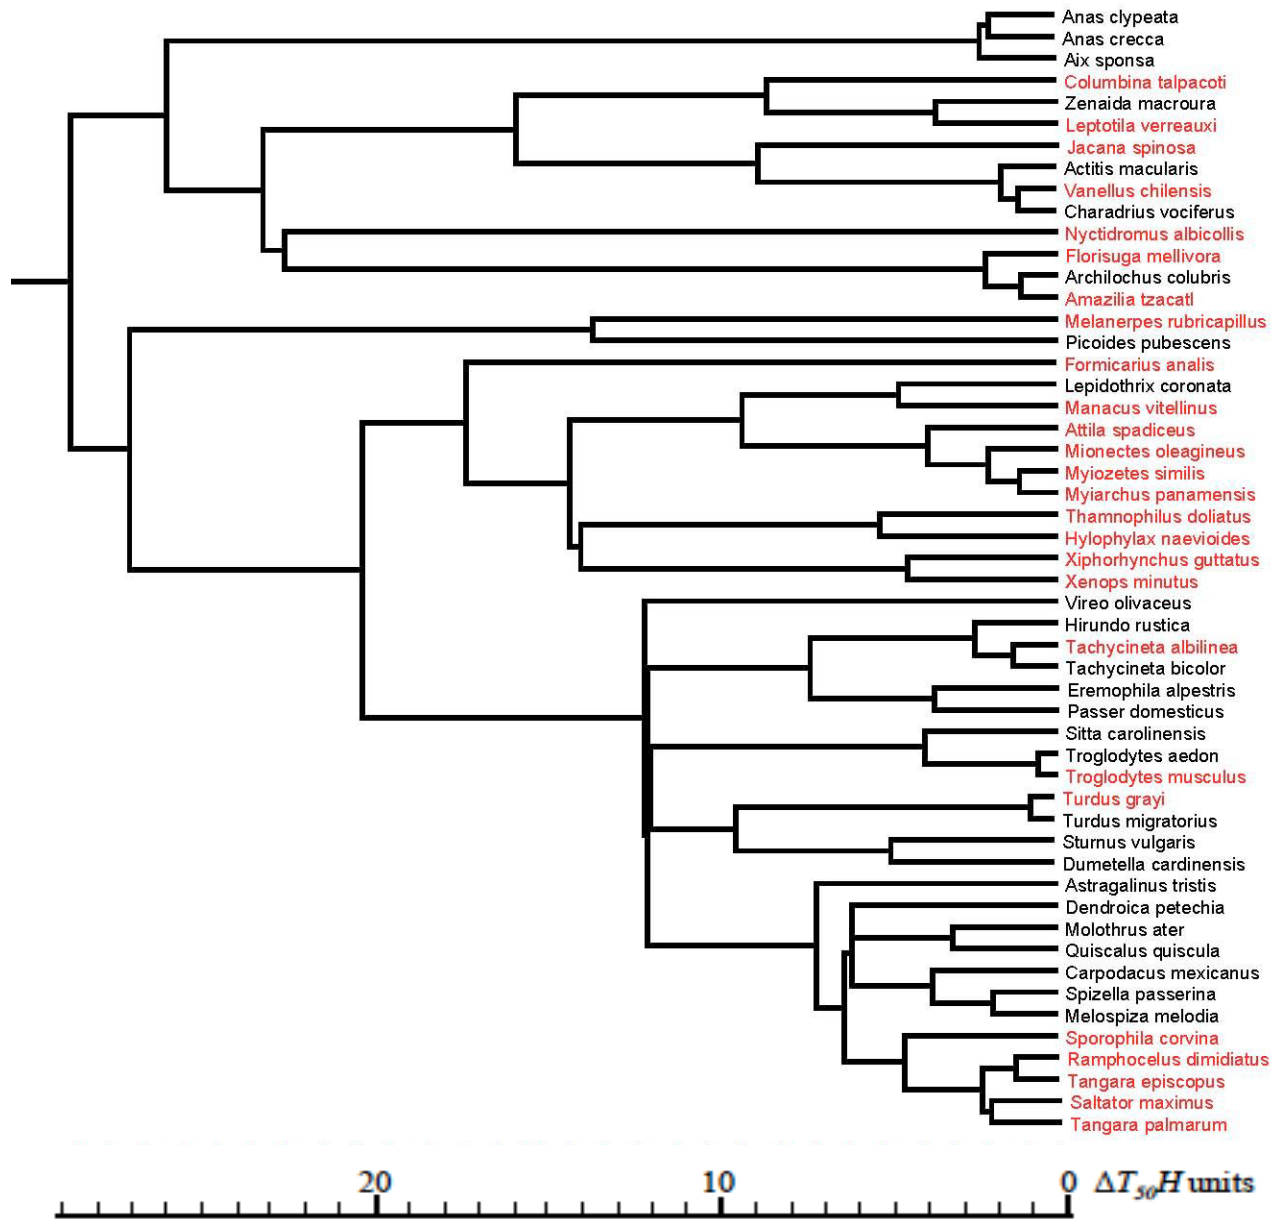

**Fig. S1.** Phylogenetic tree of 52 tropical and temperate bird species. Phylogenetic relationships are based on information assembled by Johnson and Sorenson (Johnson and Sorenson, 1999), Klicka et al. (Klicka et al., 2000), Yuri and Mindell (Yuri and Mindell, 2002) and Boyd (Boyd, 2011). Branch lengths were derived from Sibley and Ahlquist (Sibley and Ahlquist, 1990) and shown in units of difference in melting temperatures of bonded DNA strands of different species. Tropical species are designated in red lettering, and temperate species in black lettering.

Table S1. The five candidate models tested with AIC for each LD<sub>50</sub> treatment

| Model | Predictor variable(s)   | Description                           |
|-------|-------------------------|---------------------------------------|
| 1     | None                    | No effect of environment or covariate |
| 2     | Environment             | Effect of environment only            |
| 3     | Covariate               | Effect of covariate only (body mass)  |
| 4     | Environment + covariate | Additive model                        |
| 5     | Environment × covariate | Including an interaction              |
